# Supplementary material
Source: publisher figshare collection journal article supplement (https://karger.figshare.com/articles/dataset/_/5122621)

Suppl. Figure 1

Positive control

Negative control

T, Hoechst  
mouse embryo, E13

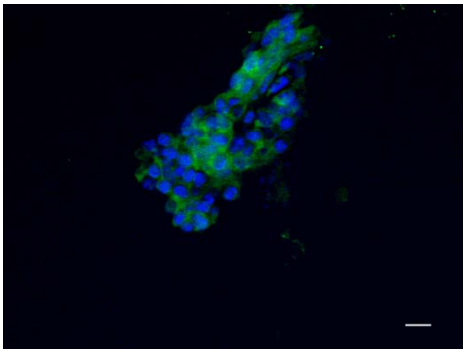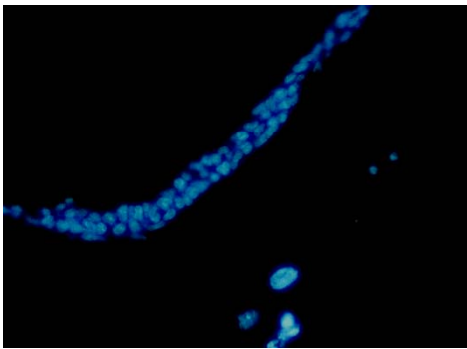

Foxa2, Hoechst  
mouse liver, E13

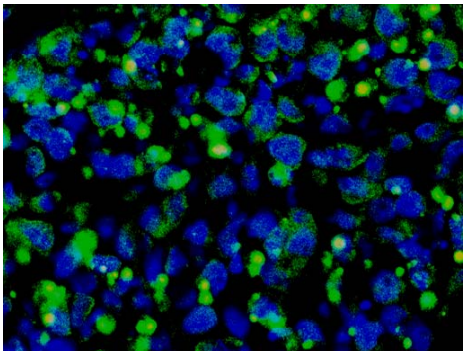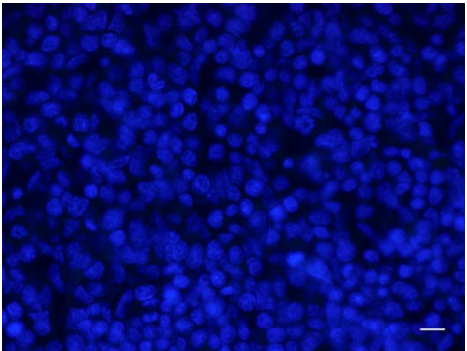

Sox9, Hoechst  
mouse liver, E13

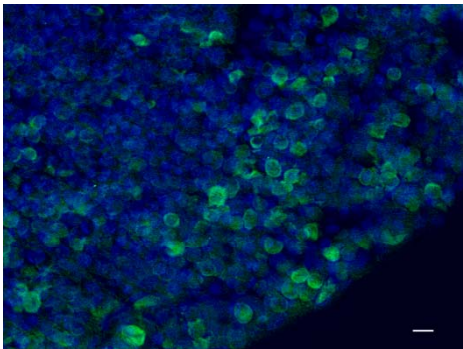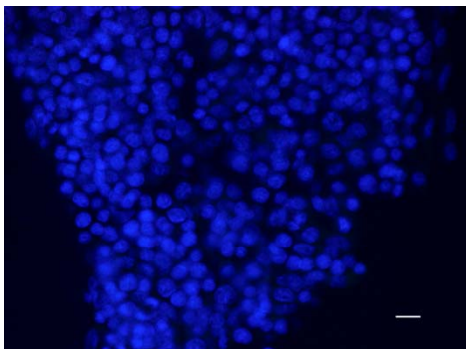

Hnf1β, Hoechst  
mouse liver, E13

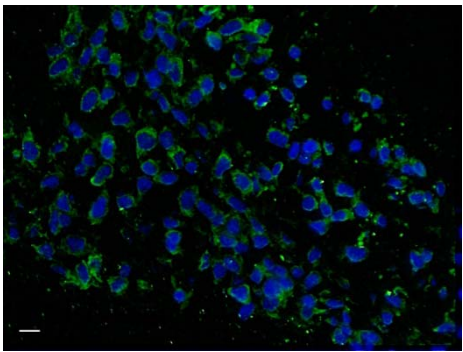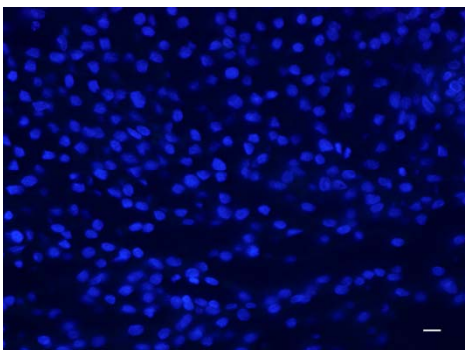

Ngn3 (Millipore), Hoechst  
mouse pancreas  
(insert: mouse brain, E13)

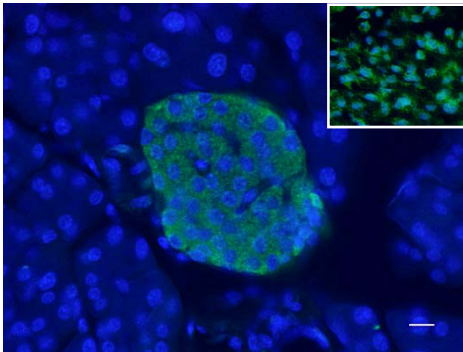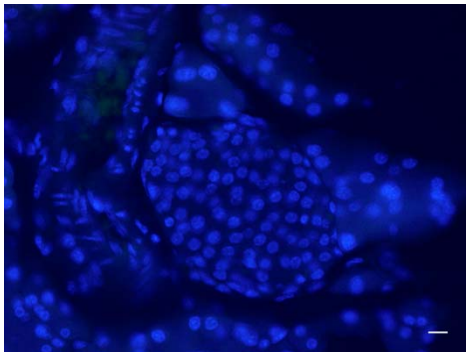

Supplement: Supplementary file 1 [file 1]
